# Supplementary material for: Geographic Disparities in Suicide Mortality in South Korea (2012-2023): Identifying Hot/Cold Spots and Associated Socioeconomic Factors
Source: Research Square preprint supplement (doi:10.21203/rs.3.rs-6892660/v1), 2025-06-17
Supplement: Supplementary file 1 [file 9a47dafe009050f5763c5d2e.docx]

**Supplemental table 1. Operational Definitions and Sources of Demographic, Environmental, and Financial Variables**

| **Variables** | **Definition** | **Source** |
| --- | --- | --- |
| Proportion of Elderly Population | The proportion of people aged 65 and older in the total population, indicating the degree of population aging.  Proportion of Elderly Population (%) = (Population aged 65 and over ÷ Total population) × 100 | *KOSIS (Korean Statistical Information Service)* |
| Crude Divorce  Rate | The crude divorce rate refers to the number of divorce cases reported in a specific year, divided by the mid-year resident population of that same year, and expressed per 1,000 people.  Crude Divorce Rate = (Number of divorces in a year ÷ Mid-year resident population) × 1,000 | *KOSIS (Korean Statistical Information Service)* |
| Total Fertility Rate | The average number of children a woman is expected to give birth to during her reproductive years (ages 15–49), calculated as the sum of age-specific fertility rates.  Total Fertility Rate = Sum of age-specific fertility rates (15–49) ÷ 1,000 | *KOSIS (Korean Statistical Information Service)* |
| Population Growth Rate | The annual percentage change in population, reflecting both natural increase and net migration.  Population Growth Rate (%) = (Population in year t – Population in year t-1) ÷ Population in year t-1 × 100 | *Ministry of the Interior and Safety, Ministry of Justice* |
| Number of medical institution beds per 1,000 population | The number of hospital beds per 1,000 people, based on the total number of beds in “medical institutions” as defined in Article 3 of the Medical Service Act.  Number of medical institution beds per 1,000 population = (Total number of hospital beds ÷ Resident registered population) × 1,000 | *Health Insurance Review and Assessment Service (HIRA), Ministry of the Interior and Safety* |
| Number of Social Welfare Facilities per 100,000 Population | The number of registered social welfare facilities per 100,000 residents.  Number of Social Welfare Facilities per 100,000 Population = Total facilities ÷ Population × 100,000 | *KOSIS (Korean Statistical Information Service), Ministry of the Interior and Safety* |
| Fiscal Independence Ratio | The proportion of local taxes and non-tax revenues in the general account revenue. It indicates the degree to which a local government finances its budget with its own resources.  Fiscal Independence Ratio (%) = (Local taxes + Non-tax revenues) ÷ Total local government budget × 100 | *Ministry of the Interior and Safety* |
| Green Area Ratio | The proportion of green space within urban areas, expressed as a percentage of the total urban land area.  Green Area Ratio (%) = (Area of green space ÷ Total urban area) × 100 | *Korea Land and Housing Corporation* |

**Supplemental table 2. Differences in Regional Characteristics According to Types of Suicide Rate Clusters (Mixed-Effects Model)**

| **Variables** | **Cold Spot (n=70)** | **Hot Spot (n=5)** | ***p*-value** |
| --- | --- | --- | --- |
| **LSMEAN (SE)** | **LSMEAN (SE)** |
| Proportion of Elderly Population | 16.2 (0.8) | 24.3 (3.0) | 0.009 |
| Crude Divorce Rate | 2.0 (0.0) | 2.3 (0.2) | 0.145 |
| Total Fertility Rate | 1.0 (0.0) | 1.2 (0.1) | 0.031 |
| Population Growth Rate | 0.2 (0.2) | 0.1 (0.8) | 0.919 |
| Number of medical institution beds per 1,000 population | 11.8 (1.1) | 9.8 (4.3) | 0.656 |
| Number of Social Welfare Facilities per 100,000 Population | 15.1 (20.8) | 20.8 (4.1) | 0.179 |
| Fiscal Independence Ratio | 35.7 (1.8) | 20.6 (6.7) | 0.029 |
| Green Area Ratio | 57.6 (2.9) | 63.5 (10.8) | 0.599 |
| Age-standardized suicide mortality (per 100,000) | 22.0 (0.4) | 30.6 (1.4) | <0.001 |

Values are presented as least squares means ± standard errors.

*p*-values derived from Type 3 Tests of Fixed Effects in mixed-effects models. Significance level set at α = 0.05

**Supplemental table 3. Descriptive Statistics of Variables Used in the Panel Data Analysis**

| **Variables** | ***n*** | **mean** | **sd** | **median** | **min** | **max** |
| --- | --- | --- | --- | --- | --- | --- |
| Suicide Rate (*t*+1) | 764 | 21.67 | 5.32 | 20.9 | 4.7 | 45.4 |
| Proportion of Elderly Population | 764 | 15.85 | 6.97 | 13.9 | 6.6 | 39.7 |
| Crude Divorce Rate | 764 | 2.03 | 0.43 | 2 | 0.9 | 3.9 |
| Total Fertility Rate | 764 | 1.02 | 0.28 | 1 | 0.42 | 2.13 |
| Population Growth Rate | 764 | 0.17 | 2.61 | -0.49 | -9.8 | 26.4 |
| Number of medical institution beds per 1,000 population | 760 | 11.81 | 9.9 | 9.6 | 0 | 70.1 |
| Number of Social Welfare Facilities per 100,000 Population | 764 | 15.1 | 9.75 | 12.65 | 2 | 53 |
| Fiscal Independence Ratio | 764 | 36.08 | 15.81 | 33.9 | 7.1 | 81.5 |
| Green Area Ratio | 764 | 57.89 | 24.86 | 62.56 | 0 | 93.36 |
